# Supplementary material
Source: Springer Nature journal article supplement (https://www.springermedizin.de/resource/supplementary/12958_2003_120_MOESM2_ESM.pdf/9566166)

log<sub>10</sub> red fluorescence

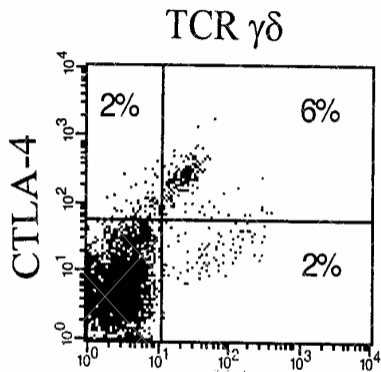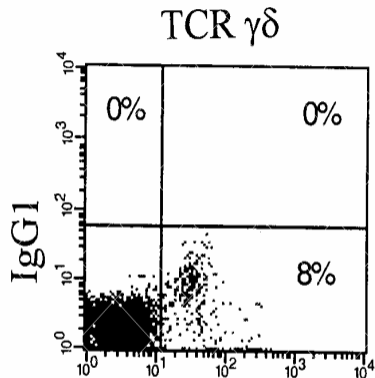

log<sub>10</sub> green fluorescence

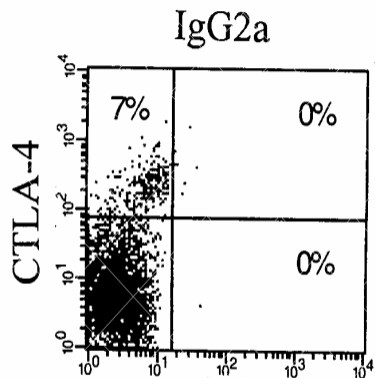

Supplement: MOESM2 [file 9566166]
